# Supplementary material for: Exploring Potential Germline-Associated Roles of the TRIM-NHL Protein NHL-2 Through RNAi Screening
Source: PubMed Central journal article supplement (PMC5633376; doi:10.1534/g3.117.300166), 2017-08-17
Supplement: 3251FileS1.pdf [file 3251FileS1.pdf]

## **SUPPLEMENTARY MATERIAL:**

### **Exploring potential germline associated roles of the TRIM-NHL protein**

#### **NHL-2 through RNAi screening**

Gregory M. Davis<sup>1,3</sup>, Wai Y. Low<sup>1,#</sup>, Joshua W.T. Anderson<sup>1,2</sup>, and Peter R. Boag<sup>1,2,\*</sup>

<sup>1</sup> Department of Biochemistry and Molecular Biology, Monash University, Wellington Road, Clayton, VIC 3800, Australia; <sup>2</sup> Development and Stem Cells Program, Monash Biomedicine Discovery Institute, Wellington Road, Clayton, VIC 3800, Australia; <sup>3</sup> School of Applied and Biomedical Sciences, Federation University, Northways Road, Churchill VIC 3842, Australia.

Keywords: NHL-2, TRIM-NHL, RNAi screen, germline, *Caenorhabditis elegans*

\* Corresponding author: email [peter.boag@monash.edu](mailto:peter.boag@monash.edu)

# Current address: The Davies Research Centre, School of Animal and Veterinary Sciences, University of Adelaide, Roseworthy, SA 5371, Australia

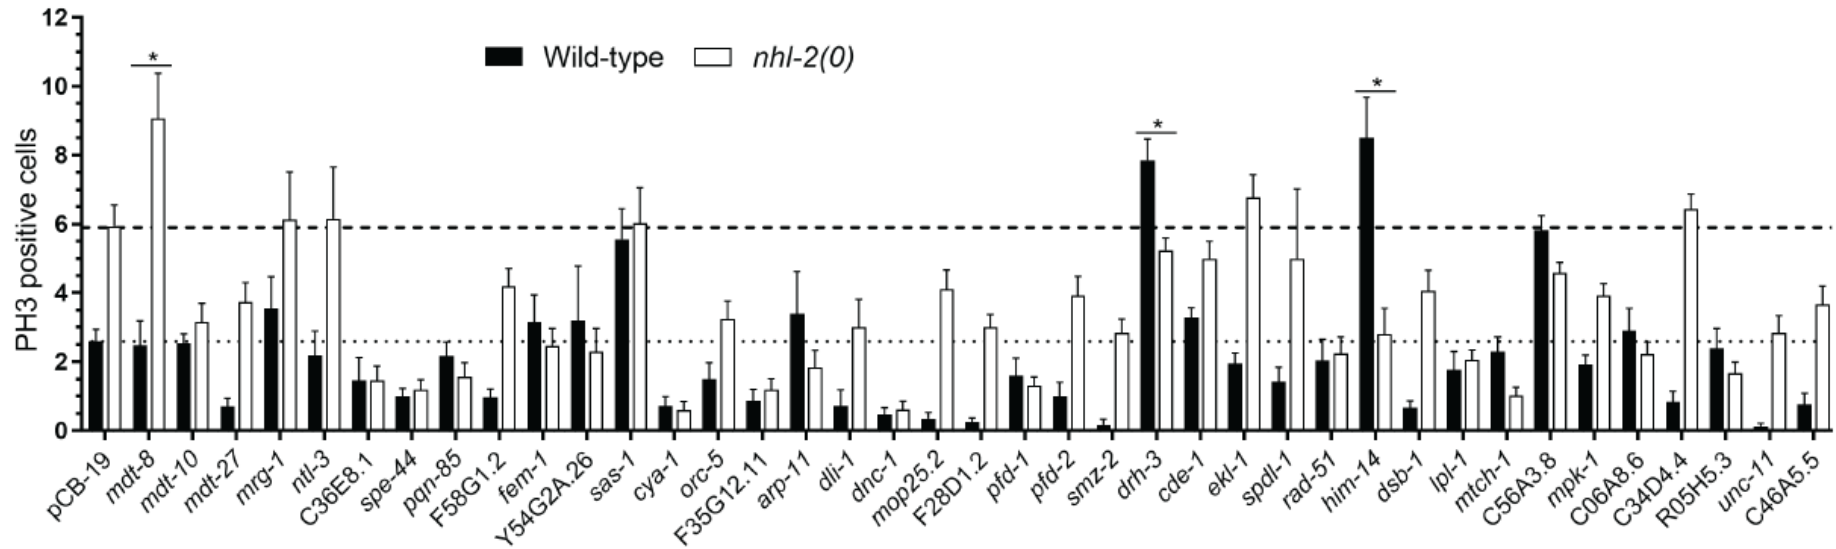

**Figure S1: Germ cell proliferation phenotypes of RNAi screen hits in *nhl-2(0)* mutants**

Knockdown of high confidence genes as listed in Table 1 immunostained and scored for PH3 positive cells. pCB-19 represents mock-treated RNAi as a positive control. Lower dotted line represents PH3 values in wild-type animals and top dashed line represents PH3 values in mock-treated *nhl-2(0)* mutants. Significance was assigned only when knockdown of a gene was significantly different that observed in *nhl-2(0)* alone. \* = P values <0.05, error bars represent standard error of mean.

**Table S1:** Primary RNAi screen results (Hp = high progeny, S = sterile, El = embryonic lethality, Lp = low progeny, La = larval arrest)

| Gene ID    | wild-type/ <i>nhl-2(0)</i> phenotypes |
|------------|---------------------------------------|
| K06H7.6    | Hp/S                                  |
| ZK287.5    | Hp/S                                  |
| B0464.5c   | Mp/S                                  |
| C18D4.6a   | Hp/El                                 |
| C32E8.10d  | Hp/S                                  |
| C32E8.10e  | Hp/S                                  |
| D2005.5    | Hp/El                                 |
| F32H2.1b   | Mp/S                                  |
| F36H1.4c   | Hp/La                                 |
| F43C1.2b   | Hp/S                                  |
| F44A6.2b   | Hp/El                                 |
| F56F3.2    | Hp/El                                 |
| F58D5.4b   | Hp/S                                  |
| M88.6b     | Mp/La                                 |
| R06F6.5b   | Hp/El                                 |
| W07B3.2d   | Mp/La                                 |
| W09C5.6b   | Mp/S                                  |
| Y17G7B.15b | Hp/S                                  |
| Y47D3A.6a  | Mp/La                                 |
| ZC410.7a   | Hp/El                                 |
| ZK520.4c   | Mp/S                                  |
| B0024.9    | Hp/El                                 |
| B0205.6    | Hp/S                                  |
| B0250.2    | Hp/Lp                                 |
| B0280.10   | Hp/Lp                                 |
| B0412.1    | Hp/Lp                                 |
| B0432.3    | Hp/S                                  |
| C01G10.8   | Hp/S                                  |
| C01H6.5b   | Hp/El                                 |
| C05B5.3    | Hp/S                                  |
| C06A8.5    | Hp/Lp                                 |
| C06A8.6    | Hp/Lp                                 |
| C07H6.8    | Hp/El                                 |
| C08F8.1    | Hp/El                                 |
| C09G4.3    | Hp/El                                 |
| C14B1.7    | Hp/El                                 |
| C25G4.4    | Hp/Lp                                 |
| C27C12.7   | Hp/S                                  |
| C30G12.7   | Hp/S                                  |
| C32A3.1    | Hp/S                                  |
| C32E8.10   | Hp/Lp                                 |
| C33H5.4    | Hp/El                                 |
| C34B2.8    | Hp/Lp                                 |

|          |       |
|----------|-------|
| C34C12.8 | Mp/S  |
| C34D4.4  | Hp/Lp |
| C35E7.9  | Hp/Lp |
| C36B1.1c | Hp/S  |
| C36E8.1  | Hp/La |
| C37A5.9  | Hp/Lp |
| C39E9.14 | Hp/El |
| C46A5.5  | Hp/Lp |
| C56A3.8  | Hp/Lp |
| D1081.5  | Hp/Lp |
| D2013.8  | Hp/El |
| E01A2.6  | Hp/Lp |
| F08F1.9  | Hp/La |
| F08G5.1  | Hp/Lp |
| F09G8.2  | Hp/Lp |
| F11G11.2 | Hp/El |
| F12F6.5  | Hp/S  |
| F16C3.1  | Hp/Lp |
| F18A1.4  | Hp/La |
| F20H11.3 | Mp/S  |
| F21H12.5 | Mp/El |
| F22B8.7  | Hp/El |
| F22D6.2  | Hp/Lp |
| F22D6.6  | Hp/El |
| F22F4.2  | Mp/El |
| F23H11.4 | Hp/El |
| F23H11.7 | Hp/Lp |
| F23H12.2 | Hp/S  |
| F26F4.11 | Mp/S  |
| F28D1.2  | Hp/La |
| F29B9.6  | Mp/S  |
| F29D10.5 | Hp/Lp |
| F31C3.5  | Hp/El |
| F32H2.1  | Hp/S  |
| F33E2.5  | Hp/Lp |
| F33H1.3  | Hp/El |
| F35D6.1a | Hp/La |
| F35H12.3 | Hp/Lp |
| F36A2.7  | Mp/S  |
| F37C12.1 | Hp/Lp |
| F43C1.2  | Hp/Lp |
| F43E2.7  | Hp/Lp |
| F46A9.4  | Hp/El |
| F52F12.4 | Hp/El |
| F54C1.9  | Hp/Lp |
| F54D7.2  | Hp/Lp |
| F57B10.8 | Hp/Lp |

|            |       |
|------------|-------|
| F58A4.9    | Mp/S  |
| F58D5.4b   | Hp/El |
| F58G1.2    | Hp/Lp |
| F59A3.3    | Hp/S  |
| H20J04.5   | Hp/El |
| H27M09.1   | Hp/El |
| K01A2.5    | Hp/S  |
| K08B4.1    | Mp/lp |
| K08E3.5    | Hp/Lp |
| K08E7.3    | Hp/El |
| K10D2.3    | Mp/El |
| K11B4.1    | Hp/S  |
| K11H3.3    | Hp/Lp |
| M7.5       | Hp/S  |
| R05D7.4    | Hp/Lp |
| R05H5.3    | Mp/El |
| R06C1.3    | Hp/El |
| R09B3.4    | Hp/El |
| R09B5.8    | Hp/El |
| R10H10.2   | Hp/S  |
| R11A5.4    | Hp/Lp |
| R12B2.5    | Mp/Lp |
| T01G9.6    | Hp/S  |
| T02E1.6    | Hp/Lp |
| T04A8.2    | Hp/Lp |
| T05E11.3   | Hp/La |
| T05F1.4    | Hp/Lp |
| T09A5.5    | Hp/S  |
| T09A5.6    | Hp/Lp |
| T09A5.9    | Hp/S  |
| T15B12.1   | Hp/S  |
| T16H12.3   | Hp/S  |
| T17H7.4d   | Hp/La |
| T18H9.6    | Hp/Lp |
| T20B12.2   | Hp/S  |
| T20H9.2    | Hp/Lp |
| T21G5.4    | Hp/El |
| T23F11.3   | Hp/Lp |
| T26A5.7    | Hp/La |
| W01G7.3    | Mp/S  |
| W02D3.9    | Hp/El |
| W06E11.2   | Hp/S  |
| Y111B2A.24 | Hp/El |
| Y37D8A.9   | Hp/S  |
| Y39A3A.1   | Hp/Lp |
| Y39E4B.10  | Hp/S  |
| Y39E4B.9   | Hp/Lp |

|            |       |
|------------|-------|
| Y43C5A.6   | Hp/EI |
| Y43H11AL.3 | Hp/Lp |
| Y4C6B.3    | Hp/Lp |
| Y53C12A.4  | Hp/Lp |
| Y53C12B.3b | Mp/lp |
| Y54G2A.26  | Hp/Lp |
| Y56A3A.1   | Hp/S  |
| Y56A3A.20  | Hp/S  |
| Y62F5A.1   | Hp/Lp |
| Y6B3B.9    | Hp/S  |
| Y70G10A.2  | Hp/Lp |
| Y74C10AR.1 | Mp/La |
| Y75B8A.35  | Mp/S  |
| Y79H2A.6   | Hp/La |
| Y95B8A.11  | Hp/Lp |
| ZC168.3    | Hp/EI |
| ZC477.9c   | EI/S  |
| ZK1010.3   | Hp/La |
| ZK1058.3   | Hp/Lp |
| ZK1098.2a  | Hp/S  |
| ZK1127.11  | Hp/S  |
| ZK1127.5   | Hp/La |
| ZK1307.5   | Mp/EI |
| ZK507.6    | Hp/Lp |
| ZK512.2    | Mp/S  |
| ZK512.6    | Hp/EI |
| ZK525.2    | Hp/Lp |
| ZK593.5    | Hp/Lp |
| R17.1      | Hp/S  |

**Table S2:** Gene ontology (GO terms) for genes associated with biological processes

| <b>GO Terms (biological process)</b>                                   | <b>Genes</b> |
|------------------------------------------------------------------------|--------------|
| anatomical structure development ( GO:0048856 )                        | 33           |
| embryo development ( GO:0009790 )                                      | 31           |
| reproduction ( GO:0000003 )                                            | 27           |
| cellular nitrogen compound metabolic process ( GO:0034641 )            | 11           |
| cell cycle ( GO:0007049 )                                              | 11           |
| locomotion ( GO:0040011 )                                              | 9            |
| biosynthetic process ( GO:0009058 )                                    | 8            |
| cell differentiation ( GO:0030154 )                                    | 8            |
| cell death ( GO:0008219 )                                              | 8            |
| chromosome segregation ( GO:0007059 )                                  | 7            |
| transport ( GO:0006810 )                                               | 6            |
| growth ( GO:0040007 )                                                  | 6            |
| cellular component assembly ( GO:0022607 )                             | 5            |
| response to stress ( GO:0006950 )                                      | 5            |
| vesicle-mediated transport ( GO:0016192 )                              | 5            |
| mitotic nuclear division ( GO:0007067 )                                | 4            |
| macromolecular complex assembly ( GO:0065003 )                         | 4            |
| chromosome organization ( GO:0051276 )                                 | 4            |
| catabolic process ( GO:0009056 )                                       | 4            |
| DNA metabolic process ( GO:0006259 )                                   | 3            |
| signal transduction ( GO:0007165 )                                     | 3            |
| cytoskeleton organization ( GO:0007010 )                               | 3            |
| protein complex assembly ( GO:0006461 )                                | 3            |
| aging ( GO:0007568 )                                                   | 3            |
| cellular protein modification process ( GO:0006464 )                   | 3            |
| cytoskeleton-dependent intracellular transport ( GO:0030705 )          | 2            |
| protein folding ( GO:0006457 )                                         | 2            |
| cell morphogenesis ( GO:0000902 )                                      | 2            |
| cell division ( GO:0051301 )                                           | 2            |
| developmental maturation ( GO:0021700 )                                | 1            |
| nucleobase-containing compound catabolic process ( GO:0034655 )        | 1            |
| translation ( GO:0006412 )                                             | 1            |
| anatomical structure formation involved in morphogenesis ( GO:0048646) | 1            |
| small molecule metabolic process ( GO:0044281 )                        | 1            |
| cell proliferation ( GO:0008283 )                                      | 1            |
| cell motility ( GO:0048870 )                                           | 1            |
| membrane organization ( GO:0061024 )                                   | 1            |

**Table S3:** Gene ontology (GO terms) for genes associated with molecular function

| <b>GO Terms (molecular function)</b>                             | <b>Genes</b> |
|------------------------------------------------------------------|--------------|
| DNA binding ( GO:0003677 )                                       | 3            |
| transcription factor activity, protein binding ( GO:0000988 )    | 3            |
| ion binding ( GO:0043167 )                                       | 2            |
| ATPase activity ( GO:0016887 )                                   | 2            |
| kinase activity ( GO:0016301 )                                   | 2            |
| unfolded protein binding ( GO:0051082 )                          | 2            |
| enzyme binding ( GO:0019899 )                                    | 2            |
| RNA binding ( GO:0003723 )                                       | 1            |
| helicase activity ( GO:0004386 )                                 | 1            |
| ligase activity ( GO:0016874 )                                   | 1            |
| signal transducer activity ( GO:0004871 )                        | 1            |
| cytoskeletal protein binding ( GO:0008092 )                      | 1            |
| nucleotidyltransferase activity ( GO:0016779 )                   | 1            |
| nucleic acid binding transcription factor activity ( GO:0001071) | 1            |
| nuclease activity ( GO:0004518 )                                 | 1            |
| lipid binding ( GO:0008289 )                                     | 1            |

**Table S4:** Gene ontology (GO terms) with genes associated with cellular compartment

| <b>GO Terms (cellular compartment)</b>       | <b>Genes</b> |
|----------------------------------------------|--------------|
| cell ( GO:0005623 )                          | 28           |
| intracellular ( GO:0005622 )                 | 28           |
| organelle ( GO:0043226 )                     | 26           |
| nucleus ( GO:0005634 )                       | 15           |
| cytoplasm ( GO:0005737 )                     | 14           |
| protein complex ( GO:0043234 )               | 13           |
| chromosome ( GO:0005694 )                    | 12           |
| cytoskeleton ( GO:0005856 )                  | 6            |
| nuclear chromosome ( GO:0000228 )            | 6            |
| nucleoplasm ( GO:0005654 )                   | 4            |
| microtubule organizing center ( GO:0005815 ) | 2            |
| Golgi apparatus ( GO:0005794 )               | 2            |
| endoplasmic reticulum ( GO:0005783 )         | 1            |
| cytoplasmic vesicle ( GO:0031410 )           | 1            |
| cytosol ( GO:0005829 )                       | 1            |
| mitochondrion ( GO:0005739 )                 | 1            |
| plasma membrane ( GO:0005886 )               | 1            |
